# Supplementary material for: Towards rapid intraoperative axial localization of spinal cord ischemia with epidural diffuse correlation monitoring
Source: PubMed Central journal article supplement (PMC8109798; doi:10.1371/journal.pone.0251271), 2021-05-10
Supplement: pone.0251271.s001.pdf [file pone.0251271.s001.pdf]

S1 Table:

Tabulation of changes in relative blood flow (rBFI %) during serial inflations (Inflation #) at three sites (Site #, 1 is most cephalad) in each of five pigs (pig #). Each inflation-site pair is labeled with the radiographically determined location of the aortic occlusion balloon (is the balloon cephalad, true/false).

| Pig # | Site # | Inflation # | Balloon cephalad? | rBFI [%] |
|-------|--------|-------------|-------------------|----------|
| 1     | 1      | 1           | TRUE              | -60.2    |
| 1     | 2      | 1           | FALSE             | -46.9    |
| 1     | 3      | 1           | FALSE             | -69.9    |
| 1     | 1      | 2           | FALSE             | -32.1    |
| 1     | 2      | 2           | FALSE             | -62.1    |
| 1     | 3      | 2           | FALSE             | -61.1    |
| 1     | 1      | 3           | TRUE              | -63.8    |
| 1     | 2      | 3           | FALSE             | -67.7    |
| 1     | 3      | 3           | FALSE             | -74.9    |
| 1     | 1      | 4           | TRUE              | -29.4    |
| 1     | 2      | 4           | TRUE              | 42.2     |
| 1     | 3      | 4           | FALSE             | -36.5    |
| 1     | 1      | 5           | TRUE              | 18.8     |
| 1     | 3      | 5           | FALSE             | -71.6    |
| 1     | 1      | 6           | TRUE              | -28.2    |
| 1     | 2      | 6           | FALSE             | -55.5    |
| 1     | 3      | 6           | FALSE             | -82.8    |
| 1     | 1      | 7           | FALSE             | -35.6    |
| 1     | 2      | 7           | FALSE             | -71.1    |
| 1     | 3      | 7           | FALSE             | -45.5    |
| 2     | 2      | 1           | FALSE             | -59.7    |
| 2     | 3      | 1           | FALSE             | -61.7    |
| 2     | 1      | 2           | TRUE              | 14.1     |
| 2     | 2      | 2           | FALSE             | 32.0     |
| 2     | 3      | 2           | FALSE             | -52.1    |
| 2     | 1      | 3           | TRUE              | 1.3      |
| 2     | 2      | 3           | TRUE              | 53.8     |
| 2     | 3      | 3           | FALSE             | -42.9    |
| 2     | 1      | 4           | TRUE              | 41.7     |
| 2     | 2      | 4           | FALSE             | -58.4    |
| 2     | 3      | 4           | FALSE             | -78.1    |
| 2     | 1      | 5           | TRUE              | 3.4      |
| 2     | 2      | 5           | TRUE              | 9.1      |
| 2     | 3      | 5           | TRUE              | 0.9      |
| 2     | 1      | 6           | TRUE              | -2.0     |
| 2     | 2      | 6           | TRUE              | 15.4     |
| 2     | 3      | 6           | TRUE              | 18.9     |
| 3     | 1      | 1           | FALSE             | -45.5    |
| 3     | 2      | 1           | FALSE             | -59.3    |
| 3     | 3      | 1           | FALSE             | -79.0    |
| 3     | 1      | 2           | TRUE              | 17.7     |
| 3     | 2      | 2           | FALSE             | -18.7    |
| 3     | 3      | 2           | FALSE             | -27.3    |
| 3     | 1      | 3           | TRUE              | 45.6     |
| 3     | 2      | 3           | TRUE              | 122.1    |
| 3     | 3      | 3           | FALSE             | 38.5     |

|   |   |   |       |       |
|---|---|---|-------|-------|
| 3 | 1 | 4 | TRUE  | 10.2  |
| 3 | 2 | 4 | TRUE  | -18.7 |
| 3 | 3 | 4 | TRUE  | 12.1  |
| 3 | 1 | 5 | FALSE | -73.5 |
| 3 | 2 | 5 | FALSE | -68.9 |
| 3 | 3 | 5 | FALSE | -70.5 |
| 4 | 1 | 1 | FALSE | -39.3 |
| 4 | 2 | 1 | FALSE | -71.9 |
| 4 | 3 | 1 | FALSE | -76.5 |
| 4 | 1 | 2 | TRUE  | 31.5  |
| 4 | 2 | 2 | FALSE | -70.0 |
| 4 | 3 | 2 | FALSE | -77.3 |
| 4 | 1 | 3 | TRUE  | 2.2   |
| 4 | 2 | 3 | TRUE  | 36.5  |
| 4 | 3 | 3 | FALSE | -57.2 |
| 4 | 1 | 4 | TRUE  | -9.7  |
| 4 | 2 | 4 | TRUE  | -14.4 |
| 4 | 3 | 4 | TRUE  | 26.3  |
| 4 | 1 | 5 | FALSE | -58.0 |
| 4 | 2 | 5 | FALSE | -81.1 |
| 4 | 3 | 5 | FALSE | -85.0 |
| 4 | 1 | 6 | TRUE  | 52.9  |
| 4 | 2 | 6 | FALSE | -77.3 |
| 4 | 3 | 6 | FALSE | 64.2  |
| 5 | 1 | 1 | FALSE | -74.3 |
| 5 | 2 | 1 | FALSE | -84.7 |
| 5 | 3 | 1 | FALSE | -77.0 |
| 5 | 1 | 2 | TRUE  | -38.3 |
| 5 | 2 | 2 | FALSE | -81.9 |
| 5 | 3 | 2 | FALSE | -73.5 |
| 5 | 1 | 3 | TRUE  | -2.3  |
| 5 | 2 | 3 | TRUE  | -14.1 |
| 5 | 3 | 3 | FALSE | -62.4 |
| 5 | 1 | 4 | TRUE  | 16.3  |
| 5 | 2 | 4 | TRUE  | 9.3   |
| 5 | 3 | 4 | TRUE  | 16.0  |
| 5 | 1 | 5 | TRUE  | 16.1  |
| 5 | 2 | 5 | TRUE  | 17.2  |
| 5 | 3 | 5 | TRUE  | 16.3  |
